# Supplementary material for: The Critical Needs and Challenges for Genetic Architecture Studies in Africa
Source: Preprints.org preprint supplement (doi:10.20944/preprints201806.0201.v1), 2018-06-13
Supplement: Supplementary file 1 [file supplementary]

Population	Country	Region (UN Statistics division geoscheme)	Latitude	Longitude	N	Language
Bamoun	Cameroon	West	5.5	10.8	18	Niger-Congo
Bulala	Chad	Central	13	18	15	Nilo-Saharan
Fang	Cameroon	West	2.5	13	15	Niger-Congo
Fulani	Nigeria	West	9	7.6	12	Niger-Congo
Hausa	Cameroon	West	9.1	7.5	12	Afro-Asiatic
Kaba	Chad	Central	8	16.8	17	Nilo-Saharan
Mada	Cameroon	West	10.8	14.1	12	Afro-Asiatic
Xhosa	South Africa	South	-32	28	3	Niger-Congo
Maasai	Kenya	East	-3.14	36.46	30	Nilo-Saharan
Luhya	Kenya	East	0.5	34.5833	99	Niger-Congo
Yoruba	Nigeria	West	7.396	3.91666	108	Niger-Congo
Mende	Sierra Leone	West	7.956	-11.74	85	Niger-Congo
Esan	Nigeria	West	6.5	6	99	Niger-Congo
Gambian	Gambia	West	13.25	-16.316	113	Niger-Congo
Algerian	Algeria	North	34.65	3.25	19	Afro-Asiatic
Egyptian	Egypt	North	30.75	31	19	Afro-Asiatic
Libyan	Libya	North	31.6	12.9	17	Afro-Asiatic
Morocco - North	Morocco	North	35.2	-5.27	18	Afro-Asiatic
Morocco - South	Morocco	North	30.9	-6.9	16	Afro-Asiatic
Saharawi	Western Sahara	North	24.66	-13.25	18	Afro-Asiatic
Tunisian	Tunisia	North	35	9.5	18	Afro-Asiatic
Brong	Ghana	West	7.5	-2	8	Niger-Congo
Igbo	Nigeria	West	6	7	15	Niger-Congo
Kongo	DRC	Central	-5.5	15	9	Niger-Congo
≠Khomani San	South Africa	South	-28.07	17.98	88	Khoisan
Hadza	Tanzania	East	-3.6	35.1	21	Language isolate
Sandawe	Tanzania	East	-5.4	34.4	35	Language isolate
Baganda	Uganda	East	0.331	32.418	100	Niger-Congo
Banyarwanda	Uganda	East	0.331	32.418	100	Niger-Congo
Barundi	Uganda	East	-1.44174	31.3191	97	Niger-Congo
Kikuyu	Kenya	East	-0.29	36.72	99	Niger-Congo
Sotho	South Africa	South	-30.44	27.9	86	Niger-Congo
Zulu	South Africa	South	-29.6	30.3833	100	Niger-Congo
Igbo	Nigeria	West	4.62705	7.23441	99	Niger-Congo
Ga-Adangbe	Ghana	West	5.6037158	-0.221984	100	Niger-Congo
Jola	Gambia	West	12.7575	-15.7355	79	Niger-Congo
Fula	Gambia	West	10.9972	11.1188	74	Niger-Congo
Wolof	Gambia	West	15.2534	-15.383	78	Niger-Congo
Mandinka	Gambia	West	13.25	-16.316	88	Niger-Congo
Kalenjin	Kenya	East	-0.36	35.26	100	Nilo-Saharan
Amhara	Ethiopia	East	11.71	39.54	46	Afro-Asiatic
Oromo	Ethiopia	East	8.67	41.44	31	Afro-Asiatic
Somali	Ethiopia*	East	4.15	40.48	52	Afro-Asiatic
Egyptian	Egypt	North	28.38	30.83	100	Afro-Asiatic
San	Namibia	South	-21	20	6	Khoisan
Biaka	Central African Republic	Central	4	17	32	Niger-Congo
Mbuti	Congo	Central	1	29	15	Nilo-Saharan
Bantu-speakers (Kenya)	Kenya	East	-3	37	12	Niger-Congo
Bantu-speakers (South Africa)	South Africa	South	-25.56926433	24.25	8	Niger-Congo
Mandenka	Senegal	West	12	-12	24	Niger-Congo
Khwe	Angola	South	-17.363921	22.950439	17	Khoisan
!Xun	Angola	South	-14.628943	17.666016	19	Khoisan
/Gui and //Gana	Botwana	South	-23.650898	24.6698	15	Khoisan
Ju/'hoansi	Namibia	South	-19.597399	20.494995	18	Khoisan
Nama	Namibia	South	-22.558559	17.072754	20	Khoisan
Karretjie	South Africa	South	-30.712638	25.101013	20	Khoisan
≠Khomani	South Africa	South	-26.974138	20.794373	39	Khoisan
Herero	Namibia	South	-22.558559	17.072754	12	Niger-Congo
Bantu-speakers (South Africa)	South Africa	South	-26.256637	28.037109	20	Niger-Congo
Coloured (Colesberg)	South Africa	South	-30.712638	25.101013	20	Indo-European
Coloured (Wellington)	South Africa	South	-33.643282	19.011841	20	Indo-European
